# Supplementary material for: Structural basis for the synergistic assembly of the snRNA export complex
Source: Springer Nature journal article supplement (doi:10.1038/s41594-025-01595-5), 2025-07-03
Supplement: MOESM1 [file 41594_2025_1595_MOESM1_ESM.pdf]

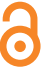

---

# Structural basis for the synergistic assembly of the snRNA export complex

---

In the format provided by the authors and unedited

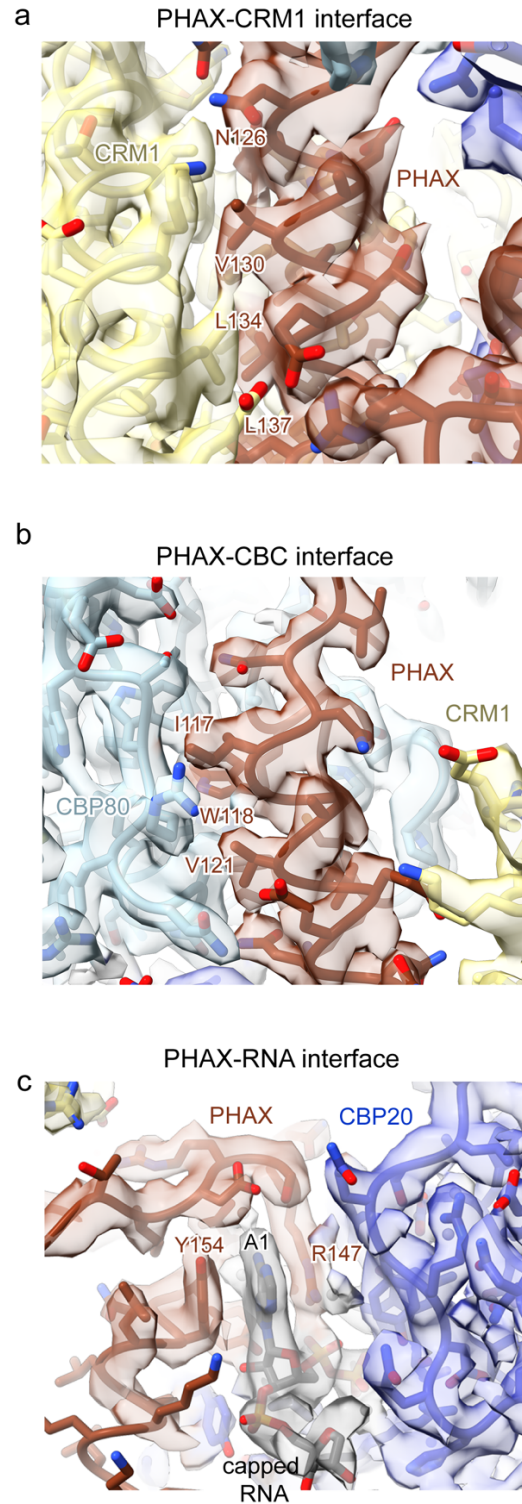

**Supplementary Figure 1. Cryo-EM density of the snRNA export complex.**

**a.** Cryo-EM density of the PHAX-CRM1 interface. **b.** Cryo-EM density of the PHAX-CBC interface. **c.** Cryo-EM density of the PHAX-RNA interface.
