# Supplementary material for: Structural basis for the synergistic assembly of the snRNA export complex
Source: Springer Nature journal article supplement (doi:10.1038/s41594-025-01595-5), 2025-07-03

Figure 5d

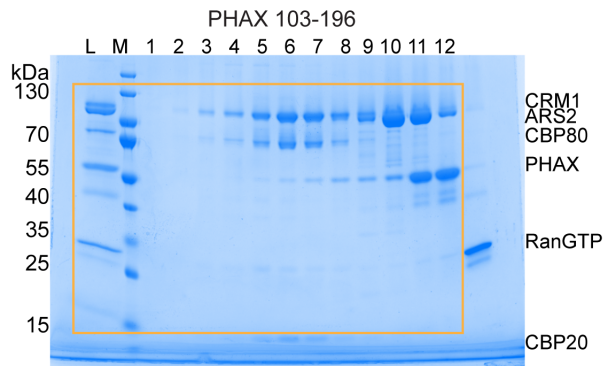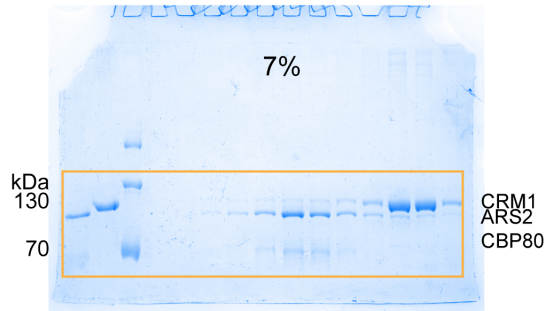

Figure 5g

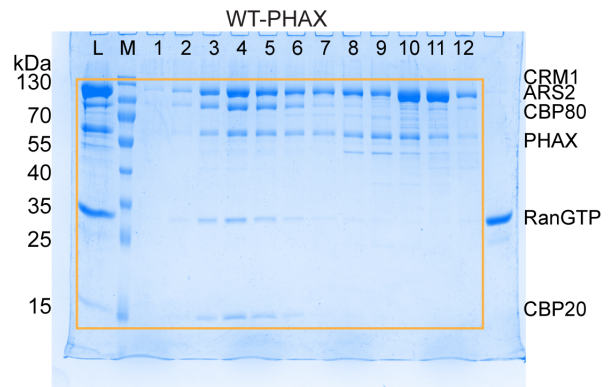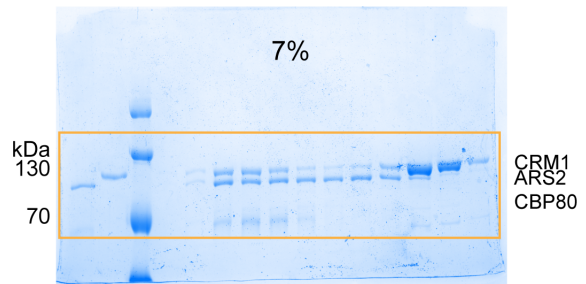

Figure 5j

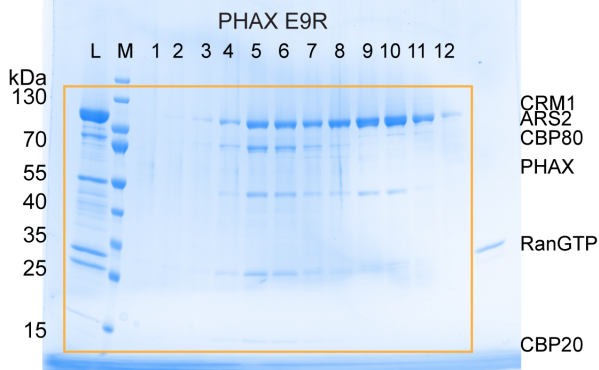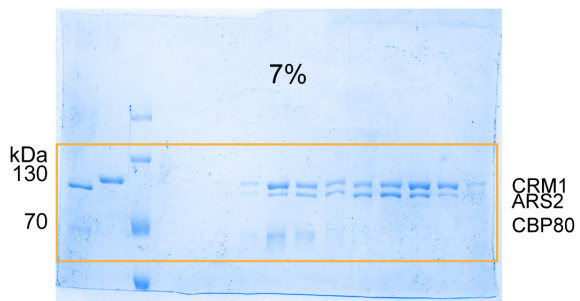

Figure 5k

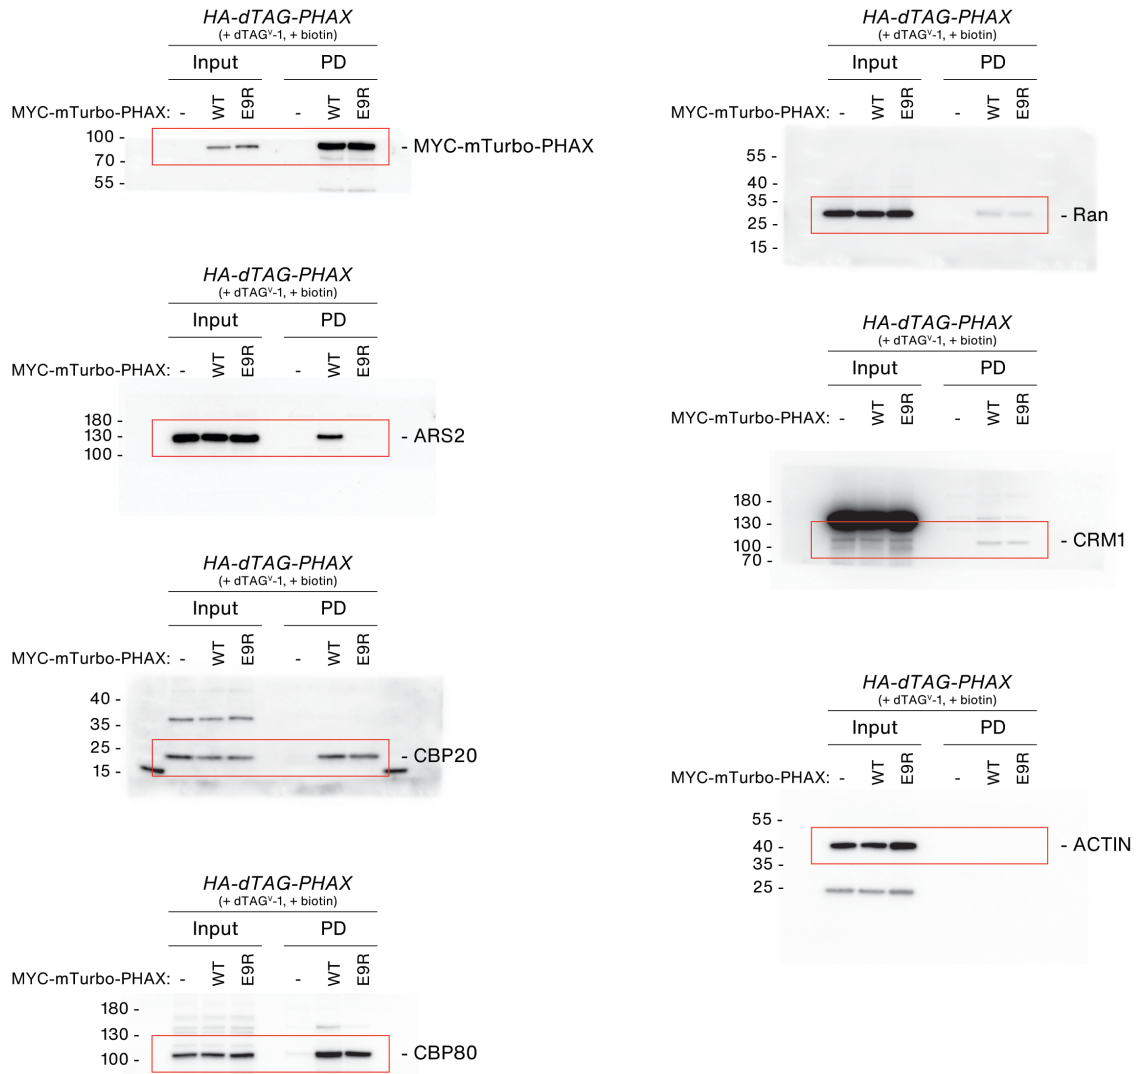

Supplement: MOESM7 [file 41594_2025_1595_MOESM7_ESM.pdf]
