# Supplementary material for: Structural basis for the synergistic assembly of the snRNA export complex
Source: Springer Nature journal article supplement (doi:10.1038/s41594-025-01595-5), 2025-07-03

Extended data Figure 5a

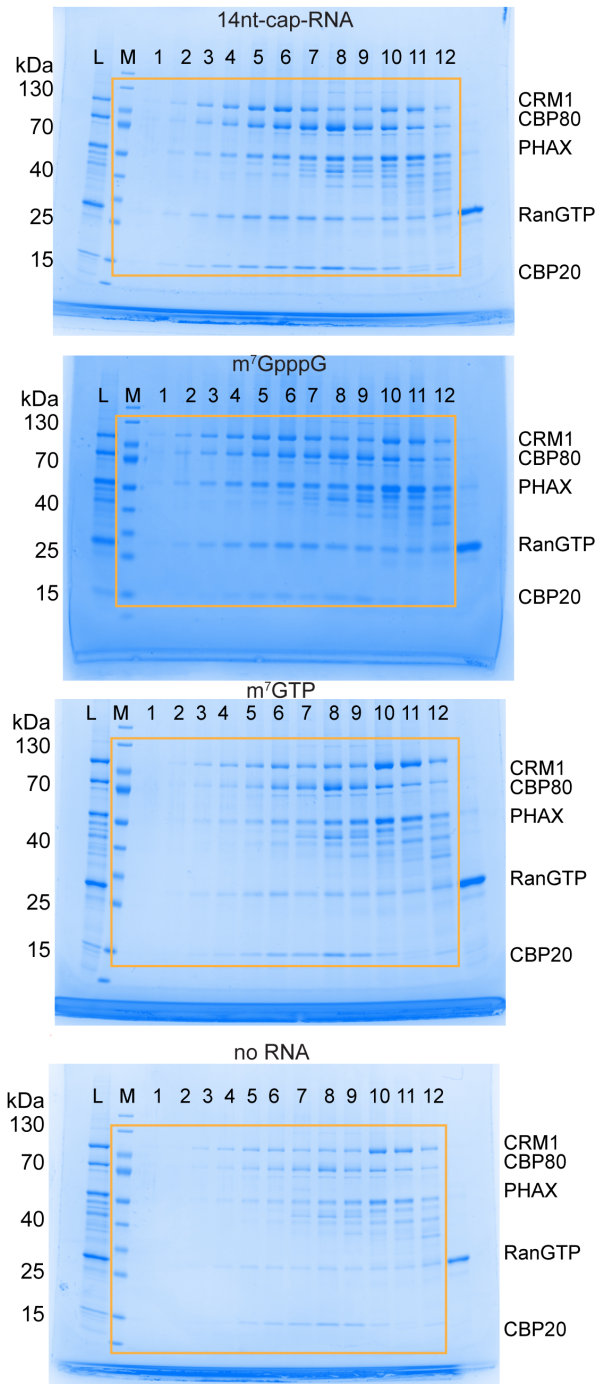

Extended data Figure 5e

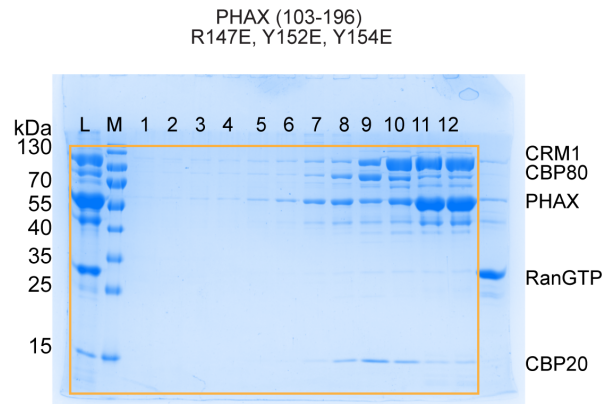

Supplement: MOESM10 [file 41594_2025_1595_MOESM10_ESM.pdf]
